# Supplementary material
Source: publisher figshare collection journal article supplement (https://geolsoc.figshare.com/ndownloader/files/4847857)
Supplement: Supplementary file 1 [file 4847857]

|  | Samples | | | | | | | | | | | | | | |
| --- | --- | --- | --- | --- | --- | --- | --- | --- | --- | --- | --- | --- | --- | --- | --- |
| Parameter / Elements | 1 | 3 | 4 | 5 | 6 | 7 | 8 | 9 | 10 | 11 | 12 | 13 | 14 | 15 | 16 |
|
| Temperature (ºC) | 13,8 | 17 | 17,7 | 17,5 | 18,3 | 20,9 | 20,7 | 21 | 21,6 | 19,4 | 13 | 10,9 | 16,3 | 10,7 | 11,5 |
| pH | 5,82 | 7,03 | 7,54 | 7,40 | 7,75 | 8,03 | 8,09 | 7,99 | 8,42 | 8,16 | 6,66 | 5,40 | 8,08 | 6,22 | 6,69 |
| Eletric condutivity (µS/cm) | 27,8 | 104,2 | 113,7 | 95,5 | 116,3 | 180,7 | 206 | 274 | 223 | 141,1 | 16,6 | 28,0 | 122,1 | 13,8 | 20,8 |
| Bicarbonate (mg/L) | 5,32 | 39,15 | 37,81 | 44,08 | 53,66 | 79,00 | 72,79 | 103,02 | 117,00 | 71,44 | 3,43 | 5,23 | 63,99 | 3,40 | 5,98 |
| Fluoride (mg/L) | 0,05 | 1,71 | 3,06 | 1,05 | 1,82 | 3,82 | 3,03 | 2,21 | 1,74 | 0,79 | bd | bd | 0,77 | bd | bd |
| Chloride (mg/L) | 3,78 | 3,31 | 2,49 | 2,45 | 2,21 | 5,43 | 4,62 | 4,83 | 4,28 | 2,67 | 2,14 | 3,37 | 2,46 | 2,44 | 2,80 |
| Sulfate (mg/L) | 1,42 | 6,12 | 6,67 | 3,75 | 6,18 | 5,46 | 8,69 | 7,84 | 10,63 | 4,72 | 0,98 | 0,29 | 4,16 | 0,219 | 0,85 |
| Nitrate (mg/L) | 2,37 | 0,58 | 0,14 | 0,66 | 0,13 | 0,07 | 11,13 | 35,93 | 0,06 | 0,09 | 0,97 | 5,01 | 0,14 | 0,58 | 1,44 |
| Magnesium (µg/L) | 367 | 1550 | 1740 | 1880 | 2750 | 3260 | 3930 | 6820 | 5160 | 2960 | 317 | 350 | 2300 | 147 | 235 |
| Silica (µg/L) | 4000 | 21400 | 17900 | 19200 | 24000 | 19500 | 15200 | 14600 | 23200 | 20300 | 1800 | 3100 | 7300 | 3100 | 3900 |
| Calcium (mg/L) | - | - | - | - | - | - | - | 23,8 | 20,1 | - | - | - | - | - | - |
| Calcium (µg/L) | 1500 | 4200 | 5600 | 5200 | 7000 | 14900 | 16600 | - | - | 12300 | 700 | 1700 | 13900 | bd | 900 |
| Sodium (µg/L) | 3510 | 15800 | 15300 | 13600 | 16300 | 21900 | 21700 | 26500 | 24700 | 16600 | 2270 | 2880 | 9170 | 2370 | 2830 |
| Potassium (µg/L) | 570 | 860 | 750 | 820 | 980 | 880 | 1240 | 1250 | 910 | 810 | 400 | 470 | 2490 | 250 | 450 |

Table 2. *Data results of physical-chemical parameters and elements (April 2013).*
